# Supplementary material
Source: Springer Nature journal article supplement (https://www.springermedizin.de/resource/supplementary/12936_2012_2145_MOESM4_ESM.pdf/9542672)

NF- $\kappa$ B p65 activation (OD 450 nm)

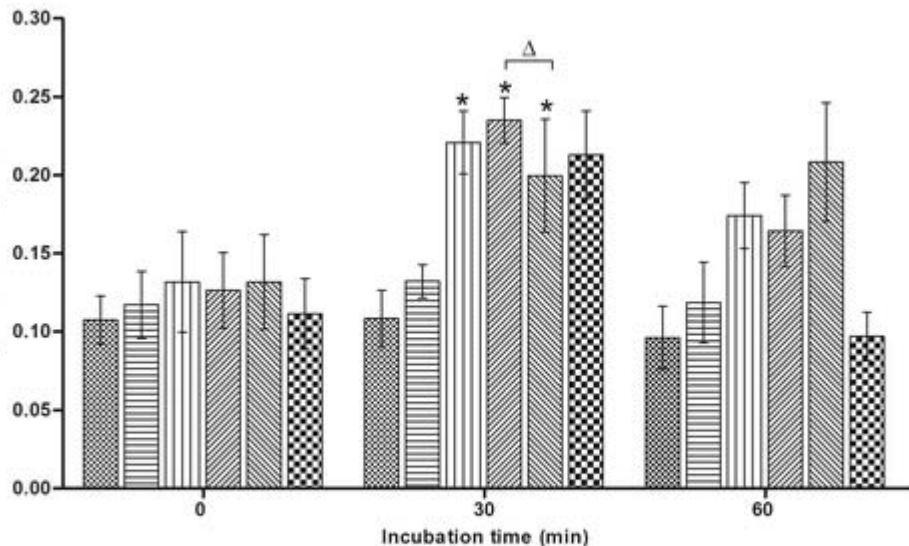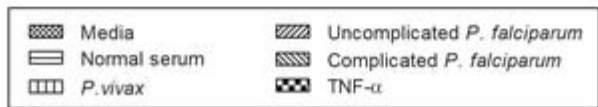

Supplement: MOESM4 [file 9542672]
